# Supplementary material for: Electrically conductive and mechanoactive scaffolds synergistically enhance osteogenic cell responses under mechanical stimulation
Source: Royal Society of Chemistry journal article supplement (doi:10.1039/d5bm01064k), 2025-12-01
Supplement: d5bm01064k2.pdf [file d5bm01064k2.pdf]

## Supplementary Information

### Electrically conductive and mechanoactive scaffolds synergistically enhance osteogenic cell responses under mechanical stimulation

Nikoleta N. Tavernaraki <sup>1</sup>, Varvara Platania <sup>1</sup>, Kalliopi Alpantaki <sup>2</sup>, Nikoleta Triantopoulou <sup>3</sup>  
Marina Vidaki <sup>3,4</sup>, Massimiliano Labardi <sup>5</sup>, Serena Danti <sup>5,6</sup>, Maria Chatzinikolaidou <sup>1,7,\*</sup>

<sup>1</sup> Department of Materials Science and Engineering, University of Crete, Heraklion, Greece

<sup>2</sup> Department of Orthopedics and Trauma, Venizeleion General Hospital, Heraklion, Greece

<sup>3</sup> Department of Basic Science, Faculty of Medicine, University of Crete, Heraklion, Greece

<sup>4</sup> Institute of Molecular Biology and Biotechnology, Foundation for Research and Technology Hellas, Heraklion, Greece

<sup>5</sup> CNR-IPCF, Sede Secondaria di Pisa, Pisa, Italy

<sup>6</sup> Department of Civil and Industrial Engineering, University of Pisa, Pisa, Italy

<sup>7</sup> Institute of Electronic Structure and Laser, Foundation for Research and Technology-Hellas, Heraklion, Greece

\* [mchatzin@uoc.gr](mailto:mchatzin@uoc.gr)

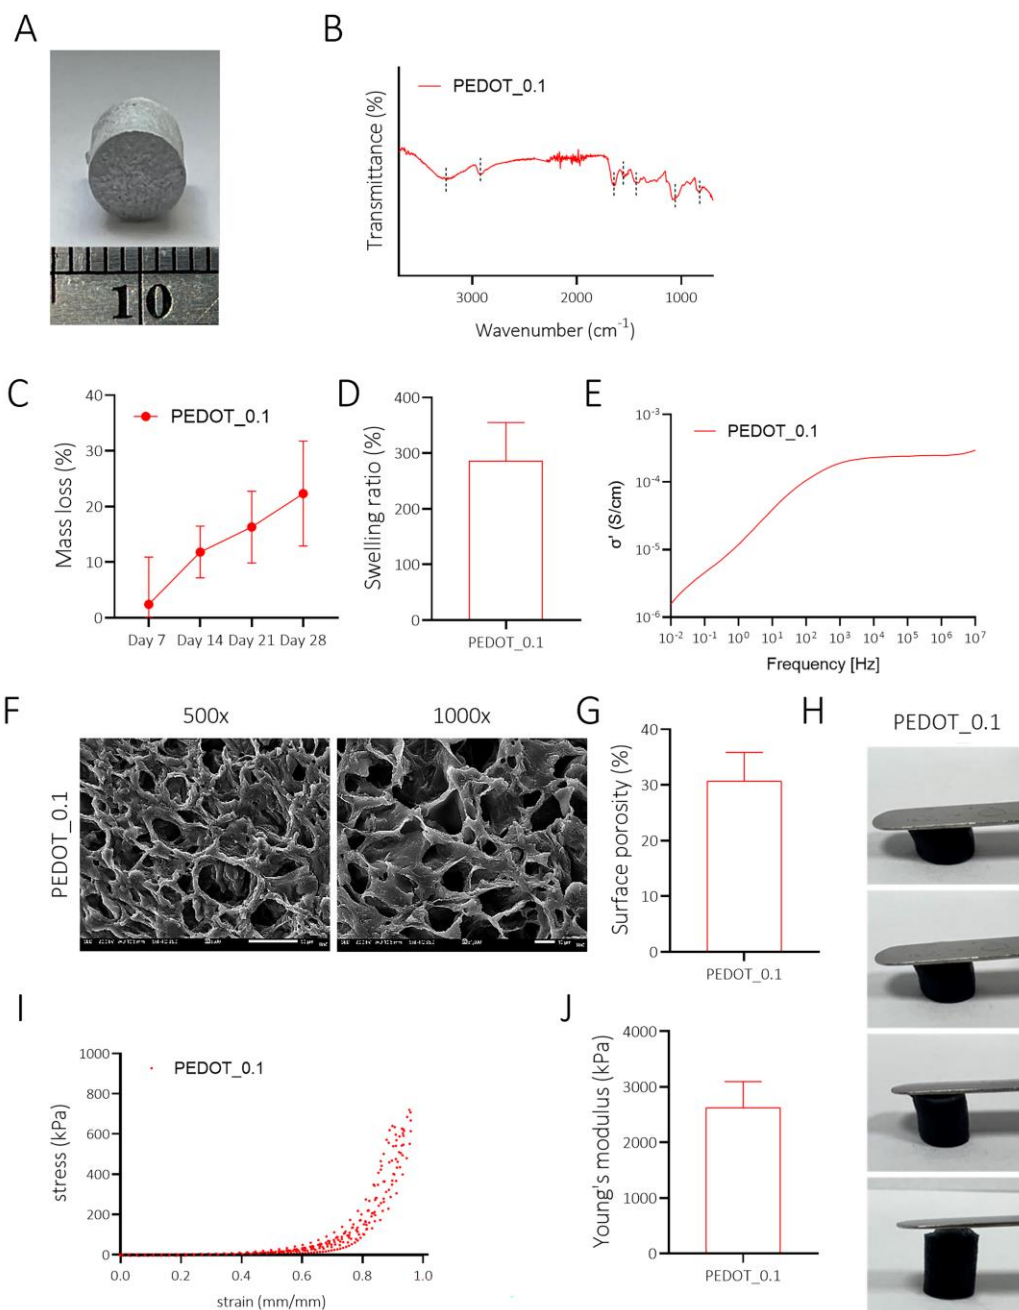

**Figure S1.** (A) Macroscopic view of freeze-dried PEDOT\_0.1 scaffolds. (B) FTIR spectra of PEDOT\_0.1 scaffold. (C) The % mass loss after 28 days in culture. (D) Swelling ratios of the lyophilized scaffolds after 3 h of immersion in PBS. (E) Evaluation of the scaffold electrical conductivity. (F) Surface porosity of both scaffold compositions depicted via SEM in two magnifications (500 $\times$  upper panel, and 1000 $\times$  lower panel; scale bars represent 50  $\mu\text{m}$  and 10  $\mu\text{m}$  respectively). (G) Evaluation of % surface porosity calculated via SEM images using ImageJ. (H) Macroscopic view of scaffolds when hydrated and manually compressed using a spatula. After compression, the scaffolds fully recovered retaining their initial shape (scale bar represents 4 mm). (I) Stress-strain curves after uniaxial compression using mechanical testing. (J) Evaluation of elastic modulus of the scaffolds at 60-90 % strain, at a velocity of 15 mm/s.

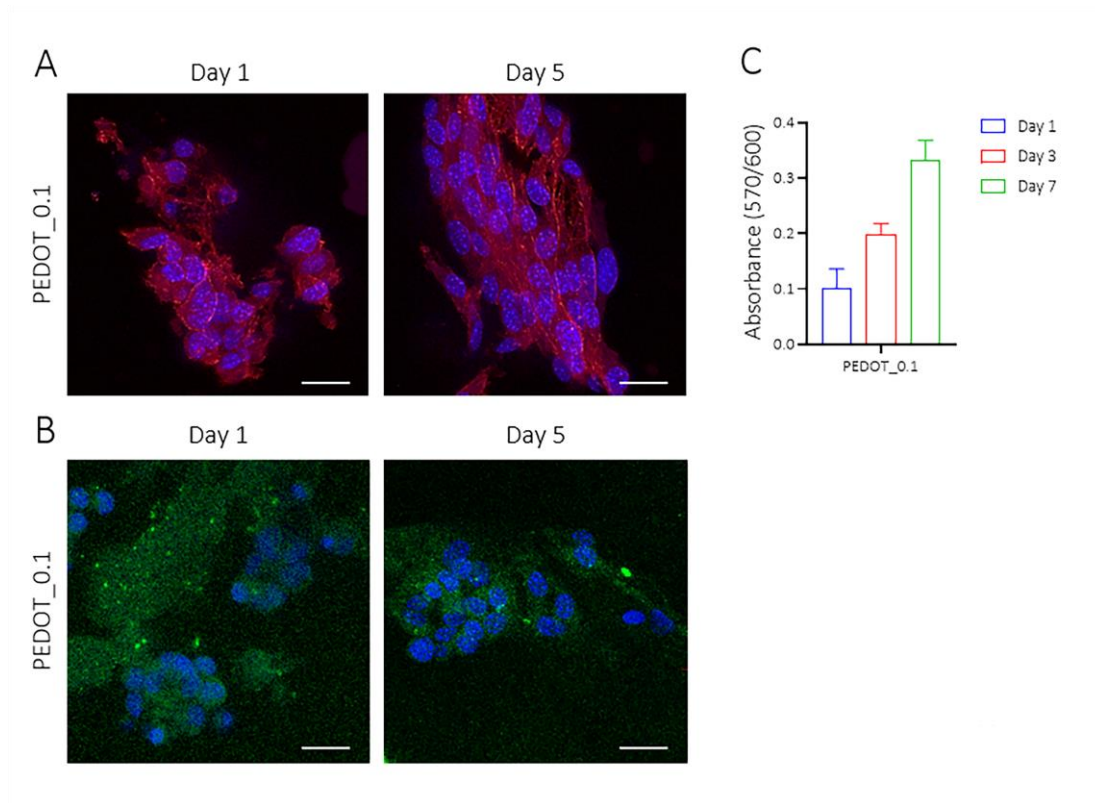

**Figure S2.** Phalloidin (red) staining showing the (A) actin cytoskeleton of pre-osteoblasts on PEDOT\_0.1 scaffolds, (B) vinculin staining (green) indicating focal adhesion points, cell nuclei were stained with DAPI (blue) (scale bar represents 50  $\mu\text{m}$ ). (C) Metabolic activity of cells on days 1, 3, and 7.
